# Supplementary material for: Konstruktion eines Testinstruments zur Erhebung des Professionswissens von Lehramtsstudierenden im Fach Sozialwissenschaften (SoWis-L)
Source: Atypon-hosted journal article supplement (doi:10.1026/0012-1924/a000313), 2023-02-14
Supplement: 0012-1924_a000313_esm1.pdf [file 0012-1924_a000313_esm1.pdf]

Elektronisches Supplement 1. Items nach Konstruktionsmerkmalen.

| Wissensbereich | Facette                        | Iteminhalt (Item ID)                        | Kognitiver Prozess   |                        | Rasch-Kennwerte |                    |
|----------------|--------------------------------|---------------------------------------------|----------------------|------------------------|-----------------|--------------------|
|                |                                |                                             | Erinnern und Abrufen | Verstehen und Anwenden | $\sigma^a$      | Infit <sup>b</sup> |
| Politik        | Politische Systemlehre         | Autoritäre Herrschaft (i1)                  | X                    |                        | 0.607           | 1.10               |
|                |                                | Personalisierte Verhältniswahl (i2)         | X                    |                        | 1.127           | 0.91               |
|                |                                | Fünfprozenthürde (i3)                       |                      | X                      | -0.790          | 1.02               |
|                |                                | Volkspartei (i4)                            | X                    |                        | -0.957          | 1.03               |
|                |                                | Opposition (i5)                             |                      | X                      | 0.635           | 0.90               |
|                |                                | Parlament (i6)                              | X                    |                        | -0.015          | 1.04               |
|                |                                | Staatsstrukturprinzipien (i16) <sup>c</sup> | X                    |                        | -0.105          | 1.07               |
|                | Internationale Beziehungen     | Nichtregierungsorganisation (i7)            | X                    |                        | -0.976          | 1.01               |
|                |                                | UN-Sicherheitsrat (i8)                      |                      | X                      | 0.551           | 1.06               |
|                |                                | Staatenverbund (i9)                         |                      | X                      | 0.492           | 0.99               |
|                | Politische Theorie             | Machbegriff (i10)                           |                      | X                      | 0.533           | 0.98               |
|                |                                | Werturteilsstreit (i11)                     | X                    |                        | 0.250           | 1.06               |
|                |                                | Demokratiethorie (i12)                      | X                    |                        | 0.386           | 1.05               |
|                |                                | Kommunitarismus (i13)                       | X                    |                        | -0.454          | 1.03               |
|                |                                | Liberalismus (i14)                          | X                    |                        | -0.750          | 0.87               |
|                |                                | Sozialismus (i15) <sup>c</sup>              | X                    |                        | -0.535          | 0.93               |
| Wirtschaft     | Wirtschafts- und Sozialpolitik | Soziale Marktwirtschaft (i17)               | X                    |                        | 0.710           | 1.02               |
|                |                                | Wirtschaftspolitische Ziele (i21)           | X                    |                        | -0.890          | 0.93               |
|                |                                | Arbeitslosigkeit (i26)                      | X                    |                        | 0.587           | 1.11               |
|                |                                | Verursacherprinzip (i27)                    | X                    |                        | 0.865           | 1.04               |
|                |                                | Leistungsgerechtigkeit (i28)                |                      | X                      | -0.276          | 0.92               |
|                | Makroökonomie                  | Subventionen (i29)                          | X                    |                        | -1.167          | 0.93               |
|                |                                | Antizyklische Fiskalpolitik (i18)           | X                    |                        | -0.190          | 0.92               |
|                |                                | Geld (i19)                                  | X                    |                        | 0.379           | 1.03               |
|                |                                | Phillipskurve (i20)                         |                      | X                      | 0.172           | 1.09               |
|                |                                | Einkommensverteilung (i31)                  |                      | X                      | 0.252           | 0.93               |
|                | Mikroökonomie                  | Staatsschuldenquote (i30)                   |                      | X                      | -0.929          | 0.96               |
|                |                                | Grenzerlös und Grenzkosten (i22)            |                      | X                      | 1.616           | 0.98               |
|                |                                | Marktformen (i23)                           | X                    |                        | 0.725           | 1.04               |
|                |                                | Homo oeconomicus (i24)                      | X                    |                        | -2.772          | 0.96               |
|                |                                | Öffentliche Güter (i25)                     | X                    |                        | 0.917           | 1.12               |
| Fachdidaktik   | Ziele und Inhalte              | Bürgerleitbilder (i33)                      |                      | X                      | -0.555          | 0.96               |
|                |                                | Fachkonzepte (i43)                          | X                    |                        | -0.151          | 0.91               |

|                                              |                                          |   |   |        |      |
|----------------------------------------------|------------------------------------------|---|---|--------|------|
|                                              | Funktionen politischer Bildung (i44)     | X |   | -0.152 | 1.00 |
| Instruktion und Vermittlung                  | Beutelsbacher Konsens (i34)              | X |   | -0.558 | 0.90 |
|                                              | Politikzyklus (i36)                      |   | X | 0.333  | 0.94 |
|                                              | Kontroversität (i37)                     |   | X | 0.965  | 0.91 |
|                                              | Exemplarisches Lernen (i38)              |   | X | -0.921 | 0.91 |
|                                              | Handlungsorientierung (i39)              |   | X | 0.238  | 1.05 |
|                                              | Unterrichtsprinzip (i40)                 | X |   | -0.742 | 1.07 |
|                                              | Kompetenzorientierung (i46) <sup>c</sup> | X |   | -0.638 | 0.96 |
| Fachbezogene Diagnostik                      | Politikbegriff (i45) <sup>c</sup>        | X |   | 1.864  | 0.96 |
|                                              | Konzeptuelles Wissen (i35)               | X |   | 0.147  | 1.02 |
|                                              | Urteilsarten (i41)                       |   | X | -0.679 | 0.94 |
| Fachbezogene Lehr-Lernforschung <sup>d</sup> | Fachtradition (i42)                      | X |   | 0.843  | 1.08 |
|                                              | Präkonzepte (i32)                        | X |   | 0.005  | 1.03 |

*Anmerkungen:* <sup>a</sup> Itemschwierigkeit (Rasch). <sup>b</sup> Weighted Mean Square (Itemfit ConQuest). <sup>c</sup> leicht adaptiert übernommen aus dem Testinstrument „Professionelle Kompetenz von Politiklehrkräften“ (PKP) von Oberle, Weschenfelder und Weißeno (2014). <sup>d</sup> inklusive Wissensbereich „Schülerkognitionen“.
