# Supplementary material for: Konstruktion eines Testinstruments zur Erhebung des Professionswissens von Lehramtsstudierenden im Fach Sozialwissenschaften (SoWis-L)
Source: Atypon-hosted journal article supplement (doi:10.1026/0012-1924/a000313), 2023-02-14
Supplement: 0012-1924_a000313_esm2.pdf [file 0012-1924_a000313_esm2.pdf]

*Elektronisches Supplement 2. Itembeispiele des SoWis-L.*

| <b>Wissensbereich</b> | <b>Facette</b>         | <b>Kognitiver Prozess</b> |
|-----------------------|------------------------|---------------------------|
| Politik               | Politische Systemlehre | Erinnern und abrufen      |

**Welche Aussage trifft auf die personalisierte Verhältniswahl zu? Die personalisierte Verhältniswahl ...**

- kombiniert die Vergabe von Direktmandaten mit dem Repräsentationsprinzip der Verhältniswahl.
- begrenzt das Repräsentationsprinzip der Verhältniswahl durch direkt-demokratische Elemente.
- ist „personalisiert“, weil mit der Zweistimme eine Person des Wahlkreises gewählt wird.
- ist „personalisiert“, weil mit der Erststimme eine Person von der Landesliste gewählt wird.

| <b>Wissensbereich</b> | <b>Facette</b>                 | <b>Kognitiver Prozess</b> |
|-----------------------|--------------------------------|---------------------------|
| Wirtschaft            | Wirtschafts- und Sozialpolitik | Erinnern und abrufen      |

**Was sind Subventionen?**

- staatliche Zuschüsse
- direkte Steuern
- Dividenden
- Investitionsabgaben

| <b>Wissensbereich</b> | <b>Facette</b> | <b>Kognitiver Prozess</b> |
|-----------------------|----------------|---------------------------|
| Soziologie            | Sozialstruktur | Erinnern und abrufen      |

**Die Befriedigung lebensnotwendiger Bedürfnisse und das Aufwachsen in einer relativ wohlhabenden Gesellschaft haben seit den 1960er Jahren in Deutschland (z.B. nach Inglehart) ...**

- zu einer stärkeren Wertschätzung von abstrakten Werten wie Selbstverwirklichung oder Freiheitsrechten geführt.
- zu einer stärkeren Wertschätzung von materiellen Werten wie Grundstücken und Geldvermögen geführt.
- zu einem allgemeinen Werteverfall geführt.
- zu einer allgemeinen Aufwertung aller Werte geführt

| Wissensbereich | Facette           | Kognitiver Prozess   |
|----------------|-------------------|----------------------|
| Fachdidaktik   | Ziele und Inhalte | Erinnern und abrufen |

Die schulische politische Bildung erfüllt mehrere Funktionen. Welche gehört nicht dazu?

- Rekrutierung politischer Nachwuchskräfte
- Bestandssicherung der politischen Ordnung
- Förderung der politischen Mündigkeit
- Auftrag zur Besserung der gesellschaftlich-politischer Zustände

| Wissensbereich | Facette                | Kognitiver Prozess     |
|----------------|------------------------|------------------------|
| Politik        | Politische Systemlehre | Verstehen und anwenden |

Was spricht für eine Abschaffung der 5%-Hürde bei der Bundestagswahl?

- Erhöhung der Chancengleichheit kleiner Parteien bei der Wahl
- Vermeidung vieler kleiner Splitterparteien im Parlament
- Sicherstellung stabiler Regierungsmehrheiten
- Verringerung der Koalitionsmöglichkeiten

| Wissensbereich | Facette       | Kognitiver Prozess     |
|----------------|---------------|------------------------|
| Wirtschaft     | Makroökonomie | Verstehen und anwenden |

Die in der nachfolgenden Abbildung dargestellte Phillips-Kurve zeigt den Zusammenhang zwischen Arbeitslosigkeit und Inflationsrate in einer Volkswirtschaft. Welche Aussage ist vor diesem Hintergrund korrekt?

- Wenn die Arbeitslosigkeit sinkt, steigt die Inflationsrate.
- Wenn die Inflation den Nullpunkt erreicht, ist die Arbeitslosigkeit niedrig.
- Wenn die Arbeitslosigkeit den Nullpunkt erreicht, ist die Inflation niedrig.
- Wenn die Arbeitslosigkeit steigt, steigt die Inflationsrate.

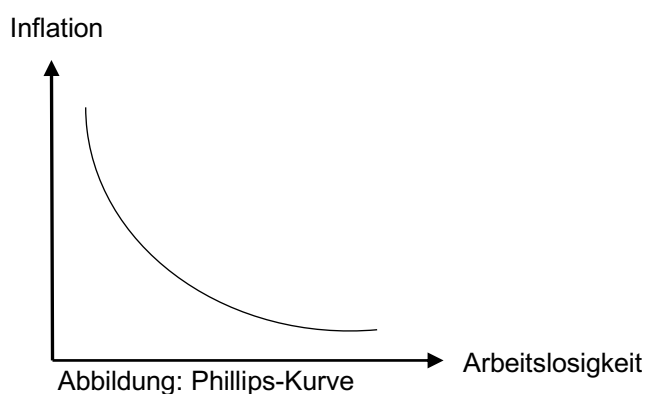

| <b>Wissensbereich</b> | <b>Facette</b>                      | <b>Kognitiver Prozess</b> |
|-----------------------|-------------------------------------|---------------------------|
| Sozialstruktur        | Soziologische Theorien und Konzepte | Verstehen und anwenden    |

**Welche Aussage zum Verhältnis von Ulrich Becks Individualisierungstheorie und Pierre Bourdieus Habitusstheorie ist korrekt? Die Individualisierungstheorie ...**

- steht in einem Widerspruch zur Habitusstheorie.
- bildet die Grundlage der Habitusstheorie.
- ist eine Weiterentwicklung der Habitusstheorie.
- ist eine Konkretisierung der Habitusstheorie.

| <b>Wissensbereich</b> | <b>Facette</b>              | <b>Kognitiver Prozess</b> |
|-----------------------|-----------------------------|---------------------------|
| Fachdidaktik          | Instruktion und Vermittlung | Verstehen und anwenden    |

**In welchem Fall wird exemplarisches Lernen umgesetzt? Der Unterricht behandelt ...**

- konkrete politische Fälle, anhand derer allgemeine Regeln und Prinzipien erarbeitet werden. Dies fördert die Übertragbarkeit des Erlernten auf eine Vielzahl von Fällen.
- konkrete politische Fälle. Die Vermeidung allgemeiner Regeln und Prinzipien fördert das politische Interesse der Schülerinnen und Schüler.
- allgemeine Regeln und Prinzipien. Die Vermeidung konkreter politischer Fälle fördert den Aufbau konzeptuellen Wissens auf Seiten der Schülerinnen und Schüler.
- allgemeine Regeln und Prinzipien, anhand derer Grundlagen des demokratischen Systems verdeutlicht werden. Dies fördert das Denken in politischen Kategorien.
