# Supplementary material for: Konstruktion eines Testinstruments zur Erhebung des Professionswissens von Lehramtsstudierenden im Fach Sozialwissenschaften (SoWis-L)
Source: Atypon-hosted journal article supplement (doi:10.1026/0012-1924/a000313), 2023-02-14
Supplement: 0012-1924_a000313_esm3.pdf [file 0012-1924_a000313_esm3.pdf]

*Elektronisches Supplement 3. Testheftdesign.*

| Position | A1             | B1             | A2             | B2             |
|----------|----------------|----------------|----------------|----------------|
| 1        | PW Items A     | FD Items B     | WW Items A     | SZ Items B     |
|          | PW Anker Items | FD Anker Items | WW Anker Items | SZ Anker Items |
| 2        | SZ Items A     | PW Items B     | FD Items A     | WW Items B     |
|          | SZ Anker Items | PW Anker Items | FD Anker Items | WW Anker Items |
| 3        | WW Items A     | SZ Items B     | PW Items A     | FD Items B     |
|          | WW Anker Items | SZ Anker Items | PW Anker Items | FD Anker Items |
| 4        | FD Items A     | WW Items B     | SZ Items A     | PW Items B     |
|          | FD Anker Items | WW Anker Items | SZ Anker Items | PW Anker Items |

*Anmerkungen:* PW = politikwissenschaftliche Testaufgaben, SZ = soziologische Testaufgaben, WW = wirtschaftswissenschaftliche Testaufgaben, FD = fachdidaktische Testaufgaben.
