# Supplementary material for: Konstruktion eines Testinstruments zur Erhebung des Professionswissens von Lehramtsstudierenden im Fach Sozialwissenschaften (SoWis-L)
Source: Atypon-hosted journal article supplement (doi:10.1026/0012-1924/a000313), 2023-02-14
Supplement: 0012-1924_a000313_esm4.pdf [file 0012-1924_a000313_esm4.pdf]

*Elektronisches Supplement 4. Modellvergleich.*

|                                                             | $\chi^2$ | <i>df</i> | <i>p</i> | CFI  | RMSEA | SRMR |
|-------------------------------------------------------------|----------|-----------|----------|------|-------|------|
| Generalfaktor                                               | 1 205.80 | 750       | < .001   | .553 | .042  | .222 |
| Zweifaktorielles Modell (Fachwissen, Fachdidaktik)          | 897.62   | 764       | < .001   | .869 | .022  | .064 |
| Dreifaktorielles Modell (Politik, Wirtschaft, Fachdidaktik) | 854.34   | 762       | .011     | .909 | .019  | .064 |

*Anmerkung:* Um die Identifizierbarkeit des Modells zu gewährleisten, wurde die Varianz des Generalfaktors auf 1 fixiert.
