# Supplementary material for: Konstruktion eines Testinstruments zur Erhebung des Professionswissens von Lehramtsstudierenden im Fach Sozialwissenschaften (SoWis-L)
Source: Atypon-hosted journal article supplement (doi:10.1026/0012-1924/a000313), 2023-02-14
Supplement: 0012-1924_a000313_esm5.pdf [file 0012-1924_a000313_esm5.pdf]

Elektronisches Supplement 5. Dreifaktorielles SoWis-L Modell.

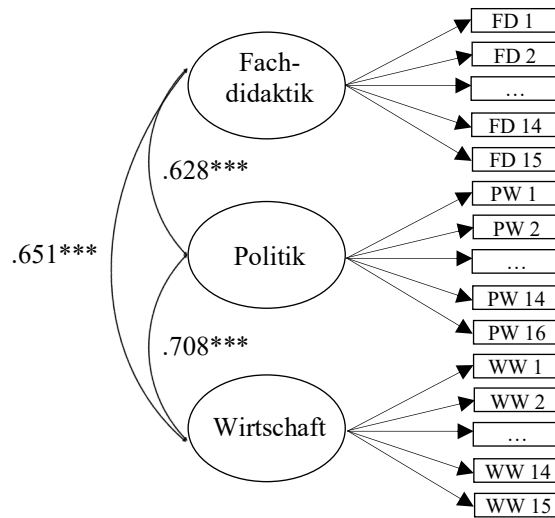

Modell Fit:  $\chi^2 = 854.34$ ,  $df = 762$ ;  $p = .011$ ; CFI = .909; RMSEA = 0.019, SRMR = .064.

Anmerkung: \*\*\* $p < .001$ .
