# Supplementary material for: Konstruktion eines Testinstruments zur Erhebung des Professionswissens von Lehramtsstudierenden im Fach Sozialwissenschaften (SoWis-L)
Source: Atypon-hosted journal article supplement (doi:10.1026/0012-1924/a000313), 2023-02-14
Supplement: 0012-1924_a000313_esm6.pdf [file 0012-1924_a000313_esm6.pdf]

Elektronisches Supplement 6. Wright-Map.

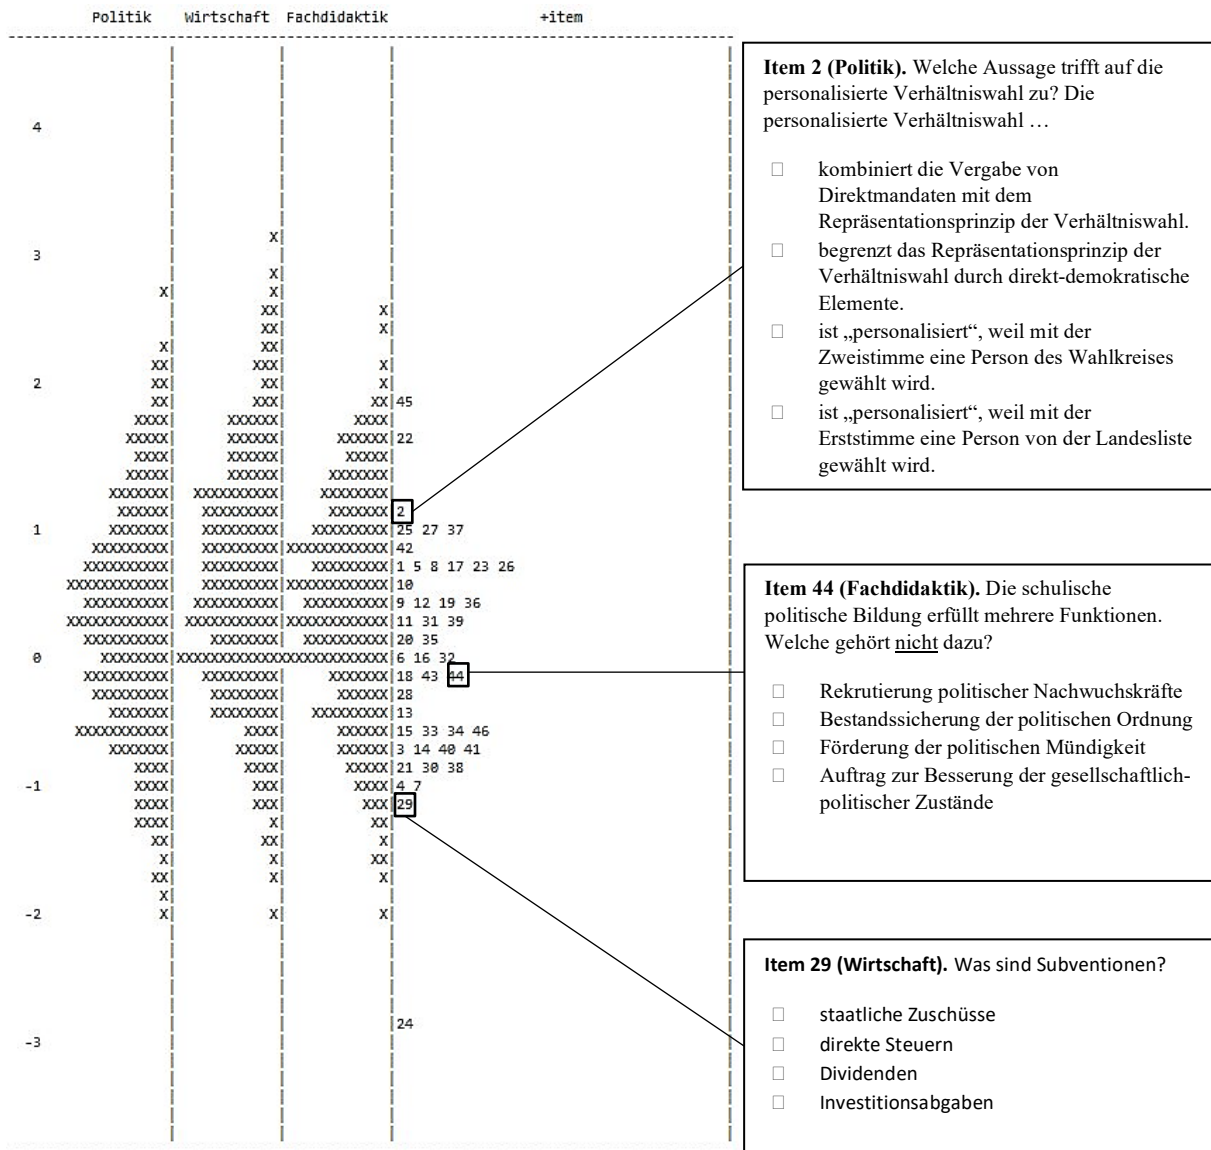

Anmerkungen: Jedes „x“ repräsentiert 1.8 Fälle. Items Nr. 1–16 Politik, 17–31 Wirtschaft und 32–46 Fachdidaktik. Die drei linken Spalten zeigen für jede Skala die Verteilung der Personenfähigkeiten, auf der rechten Seite ist die Verteilung der Itemschwierigkeiten dargestellt.
